# Supplementary material for: Ultrafast hydrogen sensing through hybrids of semiconducting single-walled carbon nanotubes and tin oxide nanocrystals
Source: Royal Society of Chemistry journal article supplement (doi:10.1039/c2nr11765g), 2012-01-01
Supplement: c2nr11765g.pdf [file c2nr11765g.pdf]

# Ultrafast hydrogen sensing through hybrids of semiconducting single-walled carbon nanotubes and tin oxide nanocrystals

Shun Mao,<sup>ab</sup> Shumao Cui,<sup>a</sup> Kehan Yu,<sup>a</sup> Zhenhai Wen,<sup>a</sup> Ganhua Lu<sup>a</sup> and Junhong Chen<sup>\*a</sup>

Department of Mechanical Engineering, University of Wisconsin-Milwaukee, 3200 N Cramer Street, Milwaukee, WI 53211, USA.

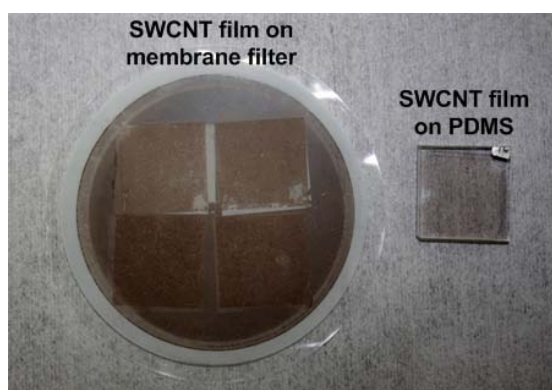

Fig. S1 SWCNT film on membrane filter (left) and PDMS (right).

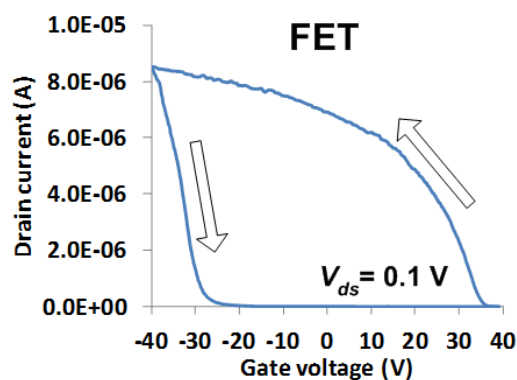

Fig. S2 FET measurement results ( $V_{ds} = 0.1$  V) of the SWCNT FET after removing metallic tubes. The SWCNT FET shows a very high on-off ratio (4 to 5 orders of magnitude).

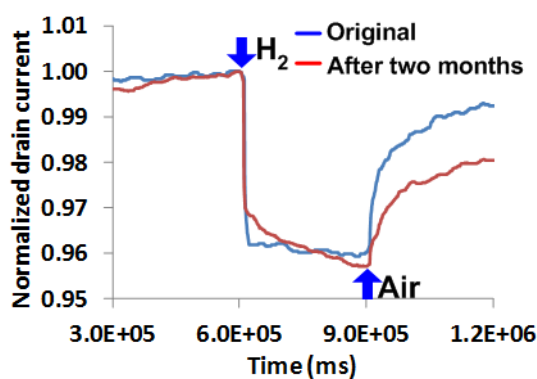

**Fig. S3** H<sub>2</sub> sensing results of the SnO<sub>2</sub> NC-SWCNT film sensor before and after storing the sensor in ambient environment for two months. The results show that the sensor has similar sensitivity and response time after the two-month storage, only with slight degradation in the recovery time.
